# Supplementary material for: Uridine Diphosphate Glycosyltransferases (UGTs) Involved in the Carotenoid-Based Body Color Difference between Tetranychus cinnabarinus (Red) and Tetranychus urticae (Green)
Source: MDPI journal article supplement (doi:10.3390/insects14100823), 2023-10-18
Supplement: s1 [file s1]

Table S1. Primer used for qPCR analysis.

| Gene         | Sequences (5' to 3')                                              | Length (bp) |
|--------------|-------------------------------------------------------------------|-------------|
| KST          | RT-F: TATTGTGCACGGATTTTGGA<br>RT-R: CCATGAGAGCGCTTGTGTGA          | 186         |
| SDR          | RT-F: TGGATCAACAAGGCTTTCCTA<br>RT-R: GCCAGCAGTTTTTCAGTTCAAG       | 174         |
| UGT          | RT-F: CCAAACATGTGGGGTGAAA<br>RT-R: GATTCGAGCACCAATTCCA            | 195         |
| PPs          | RT-F: TCAAGTTTGGCAGCATCG<br>RT-R: CCATCCCACCATTTGGAAA             | 156         |
| PSLC         | RT-F: GCAGCATTCGGTTCACGTGAC<br>RT-R: TCCCATGCATAGCCTCTGGA         | 83          |
| PDs          | RT-F: TAAGGATATGGACGCACTGACC<br>RT-R: TCAACCTTATCATCGAAACCACCT    | 81          |
| RDH2         | RT-F: CATTTTGCCCTGGTCCTG<br>RT-R: CCCGGTGACTGAATCGAG              | 167         |
| $\beta$ -UGT | RT-F: AAAGTGTTCAAAACGTGGATT<br>RT-R: TTGACACGAAAACCAATCTTCTT      | 161         |
| PLAT10       | RT-F: GAAGGGCATAGACTGCAGAA<br>RT-R: GTTCTACCATGGGCCCACAA          | 100         |
| CYP385C4     | RT-F: GGACCAGAACCTCCTTCCA<br>RT-R: TGACGCAAACAGCTCGAA             | 187         |
| PLAT11       | RT-F: GAATTGCACATGCCGATG<br>RT-R: TATTACCATGGGCCCACAAG            | 53          |
| CaaX PPR     | RT-F: GGTGATTCCCCTTGGGATA<br>RT-R: TGGCTGAGCGAGAAAAGAA            | 240         |
| RPS18        | RT-F: ACGTGCTGGTGAACCTTACCGAAGA<br>RT-R: TGCCTATTCAAGAACCAAAGTGGG | 99          |

Note: RT-F: Forward primer; RT-R: Reverse primer.

Table S2. Specific primers of used for RNAi.

| Gene | Sequences (5' to 3')                                    |
|------|---------------------------------------------------------|
| SDR  | Oligo1:<br>GGATCCTAATACGACTCACTATAGAAGCTTTACGAACTGACC   |
|      | Oligo2:<br>AAGGTCAGTTCGTAAAGCTTCTATAGTGAGTCGTATTAGGATCC |
|      | Oligo3: GGATCCTAATACGACTCACTATAGGTCAGTTCGTAAAGCTTC      |
|      | Oligo4:<br>AAGAAGCTTTACGAACTGACCTATAGTGAGTCGTATTAGGATCC |
| UGT  | Oligo1: GGATCCTAATACGACTCACTATAGAAATGTCCTCATCGTTTC      |
|      | Oligo2:<br>AAGAAACGATGAGGACATTTCTATAGTGAGTCGTATTAGGATCC |
|      | Oligo3:<br>GGATCCTAATACGACTCACTATAGAAACGATGAGGACATTTTC  |
|      | Oligo4:<br>AAGAAATGTCCTCATCGTTTCTATAGTGAGTCGTATTAGGATCC |
| PPs  | Oligo1:<br>GGATCCTAATACGACTCACTATAGTCCCAGAAAATGAAAGTC   |
|      | Oligo2:<br>AAGACTTTCATTTTCTGGGACTATAGTGAGTCGTATTAGGATCC |
|      | Oligo3: GGATCCTAATACGACTCACTATAGACTTTCATTTTCTGGGAC      |
|      | Oligo4:<br>AAGTCCCAGAAAATGAAAGTCTATAGTGAGTCGTATTAGGATCC |
| PSLC | Oligo1:<br>GGATCCTAATACGACTCACTATAGCCAGTGAACCAGATTAC    |
|      | Oligo2:<br>AAGTAAATCTGGTTCCTGGCTATAGTGAGTCGTATTAGGATCC  |
|      | Oligo3: GGATCCTAATACGACTCACTATAGTAAATCTGGTTCCTGGC       |
|      | Oligo4:<br>AAGCCAGTGAACCAGATTTACTATAGTGAGTCGTATTAGGATCC |
| PDs  | Oligo1:<br>GGATCCTAATACGACTCACTATAGGTGATGCTAAGGAAAAAC   |
|      | Oligo2:<br>AAGTTTTTCCTTAGCATCACCTATAGTGAGTCGTATTAGGATCC |
|      | Oligo3: GGATCCTAATACGACTCACTATAGTTTTCTTAGCATCACC        |
|      | Oligo4:<br>AAGGTGATGCTAAGGAAAACTATAGTGAGTCGTATTAGGATCC  |
| PLAT | Oligo1:<br>GGATCCTAATACGACTCACTATAGAATTGGTGAAGAGACAAC   |
|      | Oligo2:<br>AAGTTGTCTCTTCACCAATTCTATAGTGAGTCGTATTAGGATCC |
|      | Oligo3: GGATCCTAATACGACTCACTATAGTTGTCTCTTCACCAATTC      |
|      | Oligo4:                                                 |

---

|              |                                                     |
|--------------|-----------------------------------------------------|
|              | AAGAATTGGTGAAGAGACAACTATAGTGAGTCGTATTAGGATCC        |
|              | Oligo1: GGATCCTAATACGACTCACTATAGGTATGTTTCATGTCAGCAC |
|              | Oligo2:                                             |
|              | AAGTGCTGACATGAACATACCTATAGTGAGTCGTATTAGGATCC        |
| CaaX PPR     | Oligo3:                                             |
|              | GGATCCTAATACGACTCACTATAGTGCTGACATGAACATACC          |
|              | Oligo4:                                             |
|              | AAGGTATGTTTCATGTCAGCACTATAGTGAGTCGTATTAGGATCC       |
| CYP385C4     | RNAi-F: TAATACGACTCACTATAGGGGGCTTCTTCGAGTGAACCAG    |
|              | RNAi-R: TAATACGACTCACTATAGGGACAGGGTTGATGTCGTTTCC    |
| $\beta$ -UGT | RNAi-F: TAATACGACTCACTATAGGGCTATGATTTGGATGAAGA      |
|              | RNAi-R: TAATACGACTCACTATAGGGTCAAGATGAACTTTTTG       |

---

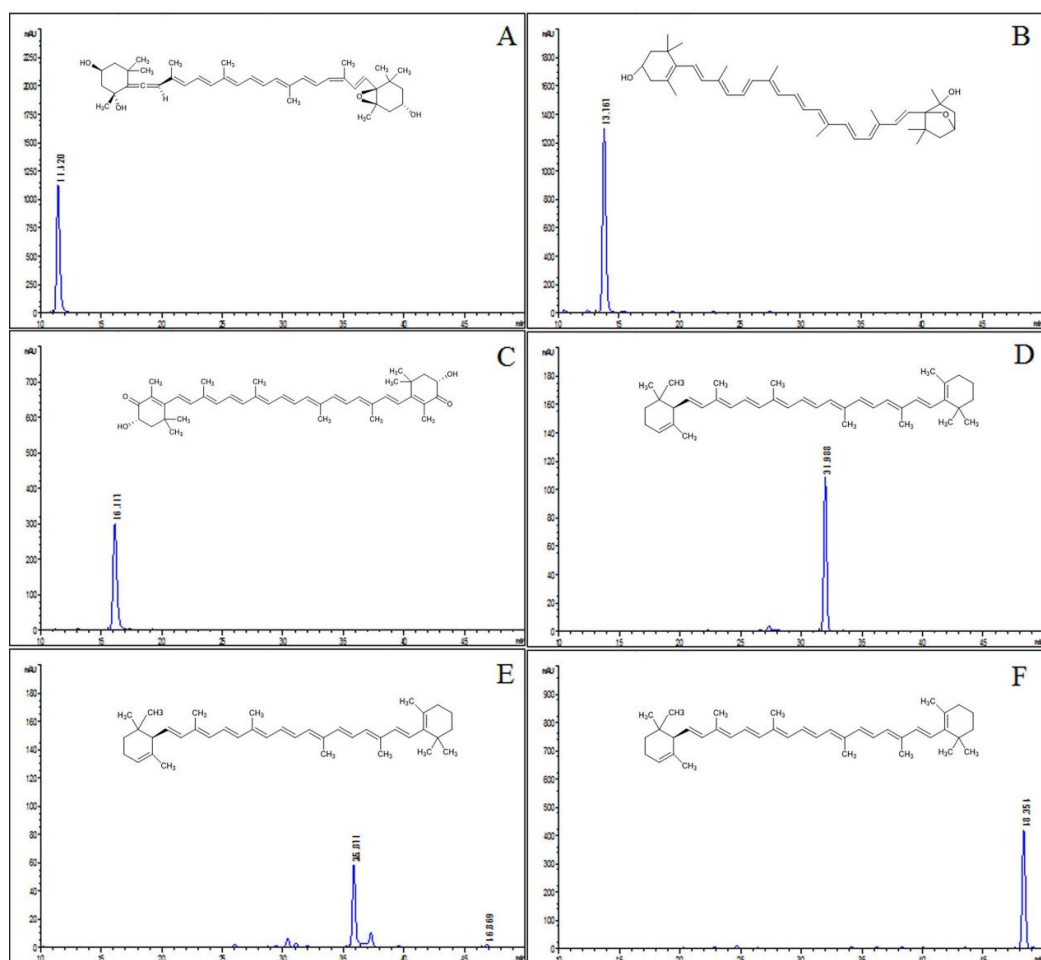

Figure S1. The chromatogram of 6 carotenoid standards.

A, neoxanthin; B, cucurbitaxanthin A; C, astaxanthin; D,  $\alpha$ -carotene; E,  $\beta$ -carotene; F,  $\gamma$ -carotene.
